# Supplementary material for: Clinical Meaningfulness of Response to Tanezumab in Patients with Chronic Low Back Pain: Analysis From a 56-Week, Randomized, Placebo- and Tramadol-Controlled, Phase 3 Trial
Source: PubMed Central journal article supplement — Pain Ther. 2022 Aug 13;11(4):1267–85. doi: 10.1007/s40122-022-00424-7 (PMC9633876; doi:10.1007/s40122-022-00424-7), 2022-08-13
Supplement: 40122_2022_424_MOESM1_ESM.pdf [file 40122_2022_424_MOESM1_ESM.pdf]

# Supplementary Material

## Clinical meaningfulness of response to tanezumab in patients with chronic low back pain: Analysis from a 56-week, randomized, placebo- and tramadol-controlled, phase 3 trial

John D. Markman <sup>a,\*</sup>, Thomas J. Schnitzer <sup>b</sup>, Serge Perrot <sup>c</sup>, Said R. Beydoun <sup>d</sup>, Seiji Ohtori <sup>e</sup>, Lars Viktrup <sup>f</sup>, Ruoyong Yang <sup>g</sup>, Candace Bramson <sup>h</sup>, Christine R. West <sup>i</sup>, Kenneth M. Verburg <sup>j</sup>

<sup>a</sup> University of Rochester School of Medicine and Dentistry, 2180 S. Clinton Ave, Rochester, NY 14618, USA; John\_Markman@URMC.Rochester.edu

<sup>b</sup> Northwestern University Feinberg School of Medicine, 710 N Lake Shore Drive, Room 1020, Chicago, IL 60611, USA; tjs@northwestern.edu

<sup>c</sup> Pain Center, Cochin Hospital, INSERM U 987, Paris University, Paris, France; serge.perrot@aphp.fr

<sup>d</sup> University of Southern California, 1520 San Pablo Street, Suite 3000, Los Angeles, CA 90033 USA; sbeydoun@usc.edu

<sup>e</sup> Chiba University, 1-8-1 Inohana, Chuo-ku, Chiba, 260-8670 Japan; [sohtori@faculty.chiba-u.jp](mailto:sohtori@faculty.chiba-u.jp)

<sup>f</sup> Eli Lilly & Company, 893 Delaware St, Indianapolis, IN 46225 USA; viktrup\_lars@lilly.com

<sup>g</sup> Pfizer Inc, 235 E 42nd St, New York, NY 10017, USA; Ruoyong.Yang@pfizer.com

<sup>h</sup> Pfizer Inc, 445 Eastern Point Road, Groton, CT 06340, USA; Candace.Bramson@pfizer.com

<sup>i</sup> Pfizer Inc, 445 Eastern Point Road, Groton, CT 06340, USA; Christine.West@pfizer.com

<sup>j</sup> Pfizer Inc, 445 Eastern Point Road, Groton, CT 06340, USA; Kenneth.M.Verburg@pfizer.com

**Corresponding author:** E-mail address: John\_Markman@URMC.Rochester.edu (J.D. Markman).

### Table of contents

|                             |        |
|-----------------------------|--------|
| Cover Page.....             | Page 1 |
| Supplementary Table 1.....  | Page 2 |
| Supplementary Table 2.....  | Page 3 |
| Supplementary Figure 1..... | Page 9 |

**Supplementary Table 1. Change from baseline in LBPI and RMDQ scores at week 16 and week 56.<sup>a,b</sup>**

|                                          | Placebo<br>(N=406) | Tanezumab<br>5 mg<br>(N=407) | Tanezumab<br>10 mg<br>(N=407) | Tramadol<br>(N=605) |
|------------------------------------------|--------------------|------------------------------|-------------------------------|---------------------|
| <b>Week 16 LBPI</b>                      |                    |                              |                               |                     |
| Mean (SD) score at baseline <sup>c</sup> | 7.19 (1.12)        | 7.24 (1.08)                  | 7.18 (1.13)                   | 7.17 (1.16)         |
| LS mean (SE) change from baseline        | -2.68 (0.15)       | -2.98 (0.14)                 | -3.08 (0.14)                  | -2.81 (0.12)        |
| LS mean (SE) difference vs placebo       | -                  | -0.30 (0.19)                 | -0.40 (0.18)                  | -0.12 (0.17)        |
| p-value vs placebo                       | -                  | 0.1117                       | 0.0281                        | 0.4620              |
| LS mean (SE) difference vs tramadol      | -                  | -0.17 (0.17)                 | -0.28 (0.17)                  | -                   |
| p-value vs tramadol                      | -                  | 0.3118                       | 0.0958                        | -                   |
| <b>Week 16 RMDQ</b>                      |                    |                              |                               |                     |
| Mean (SD) score at baseline <sup>d</sup> | 14.81 (5.14)       | 15.02 (5.21)                 | 15.06 (4.92)                  | 15.10 (5.11)        |
| LS mean (SE) change from baseline        | -4.95 (0.36)       | -6.27 (0.35)                 | -6.69 (0.35)                  | -5.21 (0.30)        |
| LS mean (SE) difference vs placebo       | -                  | -1.32 (0.45)                 | -1.74 (0.46)                  | -0.26 (0.42)        |
| p-value vs placebo                       | -                  | 0.0035                       | 0.0002                        | 0.5412              |
| LS mean (SE) difference vs tramadol      | -                  | -1.06 (0.42)                 | -1.48 (0.42)                  | -                   |
| p-value vs tramadol                      | -                  | 0.0107                       | 0.0004                        | -                   |
| <b>Week 56 LBPI</b>                      |                    |                              |                               |                     |
| LS mean (SE) change from baseline        | -                  | -2.52 (0.17)                 | -2.62 (0.17)                  | -2.40 (0.15)        |
| LS mean (SE) difference vs tramadol      | -                  | -0.11 (0.20)                 | -0.21 (0.20)                  | -                   |
| p-value vs tramadol                      | -                  | 0.5763                       | 0.2887                        | -                   |
| <b>Week 56 RMDQ</b>                      |                    |                              |                               |                     |
| LS mean (SE) change from baseline        | -                  | -4.85 (0.45)                 | -5.23 (0.44)                  | -4.41 (0.36)        |
| LS mean (SE) difference vs tramadol      | -                  | -0.44 (0.52)                 | -0.83 (0.52)                  | -                   |
| p-value vs tramadol                      | -                  | 0.3981                       | 0.1089                        | -                   |

<sup>a</sup> LBPI scores range from 0 to 10 and RMDQ scores range from 0 to 24; negative values represent an improvement in pain, disability, and disease status, respectively.

<sup>b</sup> These results have been disclosed previously in the primary publication (Markman JD, et al. Pain. 2020;161(9): 2068-78).

<sup>c</sup> Baseline n is 404, 406, 406, and 605 for placebo, tanezumab 5 mg, tanezumab 10 mg, and tramadol, respectively.

<sup>d</sup> Baseline n is 406, 405, 407, and 605 for placebo, tanezumab 5 mg, tanezumab 10 mg, and tramadol, respectively. LBPI, low back pain intensity; LS, least-squares; RMDQ, Roland Morris Disability Questionnaire; SD, standard deviation; SE, standard error.

**Supplementary Table 2. List of IECs or IRBs approving the study protocol.**

---

Schulman Associates IRB  
4445 Lake Forest Dr, Ste 300  
Cincinnati, OH 45242  
UNITED STATES

---

Western Institutional Review Board  
1019 39th Ave SE, Ste 120  
Puyallup, WA 98374-2115  
UNITED STATES

---

Advarra IRB  
6940 Columbia Gateway Dr, Ste 110  
Columbia, MD 21046  
UNITED STATES

---

Partners Human Research Committee  
399 Revolution Dr, Ste 710  
Somerville, MA 02145  
UNITED STATES

---

USC Health Sciences Institutional Review Board  
1200 N State St, Ste 4700  
Los Angeles, CA 90033  
UNITED STATES

---

Human Subjects Research Office  
1400 NW 10th Ave, 12th Fl (M809) Ste 1200A  
Miami, FL 33136  
UNITED STATES

---

Northwestern University Institutional Review Board  
750 N Lake Shore Dr  
Chicago, IL 60611  
UNITED STATES

---

De Videnskabsetiske Komiteer for Region Syddanmark  
Regionshuset, Damhaven12,  
Vejde, 7100  
DENMARK

---

Comite de Protection des Personnes  
9 avenue Charles de Gaulle-de-France VIII, Hopital Ambroise Pare  
Boulogne Billancourt, 92100  
FRANCE

---

Egeszsegugyi Tudomanyos Tanacs  
Klinikai Farmakologiai Etikai Bizottsaga  
Arany Janos. u. 6-8  
Budapest, 1051  
HUNGARY

Local Incorporated Administrative Agency Rinku General Medical Center Institutional Review Board

2-23, RinkuOuraikita

Izumisano, OSAKA 598-8577

JAPAN

---

IRB of All Tohoku Clinical Trial Review and Audit Organization

1-6-10, Kamisugi, Aoba-ku

Sendai, MIYAGI 980-0011

JAPAN

---

SHINAGAWA EAST ONE MEDICAL CLINIC IRB

2-16-1, Konan, Shinagawa East One Tower 3F

Minato-ku, TOKYO 108-0075

JAPAN

---

IRB of Funabashi municipal Medical Center

1-21-1, Kanasugi

Funabashi, CHIBA 273-8588

JAPAN

---

National Hospital Organization Central Review Board

2-5-21, Higashigaoka

Meguro-ku, TOKYO 152-0021

JAPAN

---

Drug Acceptance Research Review Board of Toyama University Hospital

2630 Sugitani

Toyama, TOYAMA 930-0194

JAPAN

---

Medical Corporation Koyukai Nishi Hospital IRB

3-2-18 Bingo-Cho, Nada

Kobe, HYOGO 657-0037

JAPAN

---

Medical corporate corporation hoshikai Onishi medical clinic IRB

2-9-1, Kunioka Inami-cho

Kako-gun, HYOGO 675-1115

JAPAN

---

MARUNOUCHI HOSPITAL INSTITUTIONAL REVIEW BOARD

1-7-45, Nagisa

Matsumoto, NAGANO 390-8601

JAPAN

---

Chiba Rosai Hospital Institutional Review Board

2-16, Tatsumidai-Higashi

Ichihara, CHIBA 290-0003

JAPAN

---

Adachikyou Sai Hospital Institutional Review Board

1-36-8 Yanagihara

Adachi, TOKYO 120-0022

JAPAN

---

Kobe Red Cross Hospital Institutional Review Board

1-3-1 Wakinohamakaigandori, Chuo-ku

Kobe, HYOGO 651-0073

JAPAN

---

IRB of All Tohoku Clinical Trial Review and Audit Organization

1-6-10, Kamisugi, Aoba-ku

Sendai, MIYAGI 980-0011

JAPAN

---

Hamamatsu university school of medicine, University hospital Institutional Review Board

1-20-1 Handayama, Higashi-ku

Hamamatsu, SHIZUOKA 431-3192

JAPAN

---

Chiba Central Medical Center IRB

1835-1, Kasoricho, Wakaba-ku

Chiba, CHIBA 264-0017

JAPAN

---

Saiseikai Central Hospital IRB

1-4-17, Mita

Minato-ku, TOKYO 108-0073

JAPAN

---

Medical Co. Keiaikai Saga Memorial Hospital Institutional Review Board

1240-1,oaza-Nagase,Takakise-machi

Saga, SAGA 849-0917

JAPAN

---

Fukui General Hospital Institutional Review Board

58-16-1 Egami-cho,

Fukui, FUKUI 910-3113

JAPAN

---

Yamaguchi University Hospital Institutional Review Board

1-1-1, Minami-Kogushi

Ube, YAMAGUCHI 755-8505

JAPAN

---

Haradoi Hospital Institutional Review Board

6-40-8, Aoba, Higashi-ku

Fukuoka, FUKUOKA 813-8588

JAPAN

---

Jinbo Orthopedics Clinical Institutional Review Board

5-38-41, Honcho

Koganei, TOKYO 184-0004

JAPAN

---

Keio University Hospital IRB

35, Shinano-machi

Shinjuku-ku, TOKYO 160-8582

JAPAN

---

Yonezawa City Hospital Institutional Review Board

6-36, Aioi-cho

Yonezawa, YAMAGATA 992-8502

JAPAN

---

Hiroshima Red Cross Hospital & Atomic-bomb Survivors Hospital Institutional Review Board

1-9-6, Senda-machi, Naka-ku

Hiroshima, HIROSHIMA 730-8619

JAPAN

---

Institutional Review Board of International Health and Welfare Group of Kyushu district

3-6-45, Momochihama, Sawara-ku

Fukuoka, FUKUOKA 814-0001

JAPAN

---

Chiba University Hospital Institutional Review Board

1-8-1 Inohana, Chuo-ku

Chiba, CHIBA 260-8677

JAPAN

---

Saitama Municipal Hospital Institutional Review Board

2460 Mimuro, Midori-ku

Saitama, SAITAMA 336-8522

JAPAN

---

Sakayori Clinic IRB

2-26-3, Higashioi

Shinagawa-ku, TOKYO 140-0011

JAPAN

---

Sapporo City General Hospital IRB

13-1-1, Kita11jonishi, Chuo-ku

Sapporo, HOKKAIDO 060-8604

JAPAN

---

Nagoya University Hospital IRB

Tsurumai-cho, Showa-ku, 65

Nagoya, AICHI 466-8560

JAPAN

---

Shimonoseki City Hospital IRB

1-13-1, Koyo-cho

Shimonoseki-shi, YAMAGUCHI 750-8520

JAPAN

---

Minamiosaka Hospital IRB

1-18-18, Higashikagaya

Suminoe-ku, Osaka, OSAKA 559-0012

JAPAN

---

Aichi Medical University Hospital IRB

1-1 Yazakokarimata  
Nagakute, AICHI 480-1195  
JAPAN

---

Hayashi Diabetes Clinic IRB  
3-2, Shinei-cho, Abeasa Medical 2F  
Chigasaki, KANAGAWA 253-0044  
JAPAN

---

Toyooka Chuo Hospital Institutional Review Board  
2-1-5 Toyooka 7jo  
Asahikawa, HOKKAIDO 078-8237  
JAPAN

---

Tokyo Medical and Dental University Medical Hospital IRB  
1-5-45 Yushima  
Bunkyo-ku, TOKYO 113-8519  
JAPAN

---

Kyushu Rosai Hospital IRB  
1-1 Sonekitamachi, Kokuraminami-ku,  
Kitakyushu, FUKUOKA 800-0296  
JAPAN

---

Jimbo Orthopedics IRB  
5-38-41, Honcho  
Koganei, TOKYO 184-0004  
JAPAN

---

Hakodate Central General Hospital IRB  
Honcho, 33-2  
Hakodate, HOKKAIDO 040-8585  
JAPAN

---

Institutional Review Board of Seoul National University Hospital  
101 Daehak-ro, Jongno-gu  
Seoul, KOREA 03080  
REPUBLIC OF KOREA

---

Institutional Review Board of KyungHee University Hospital  
23, Kyungheedaero, Dongdaemun-gu  
Seoul, 02447  
REPUBLIC OF KOREA

---

Institutional Review Board, Severance Hospital, Yonsei University Health System  
50-1 Yonsei-ro, Seodaemun-gu  
Seoul, 03722  
REPUBLIC OF KOREA

---

IRB of Samsung Medical Center  
81 Irwon-ro, Gangnam-gu  
Seoul, 06351  
REPUBLIC OF KOREA

Institutional Review Board / Institutional Ethics Committee of Korea University Guro Hospital  
148 Gurodong-ro, Guro-gu  
Seoul, 152-703 (08308)  
KOREA, REPUBLIC OF

---

Comite etico Investigacion Clinica Grupo Hospitalario Quiron en Barcelona  
Sede de Gestion. Fundacion Teknon, C/ Vilana, 12  
Barcelona, BARCELONA 08022  
SPAIN

---

Regionala Etikprovningssamnden i Goteborg  
Guldhedsgatan 5 A  
Goteborg, 413 20  
SWEDEN

---

Etikprövningsmyndigheten  
Box 2110  
Uppsala, 750 02  
SWEDEN

---

IEC, independent ethics committee; IRB, institutional review board



**Supplementary Figure 1. Proportion of patients with  $\geq 30\%$  and  $\geq 50\%$  improvement from baseline in LBPI (A) and RMDQ (B) at week 16 and week 56.<sup>a</sup>**

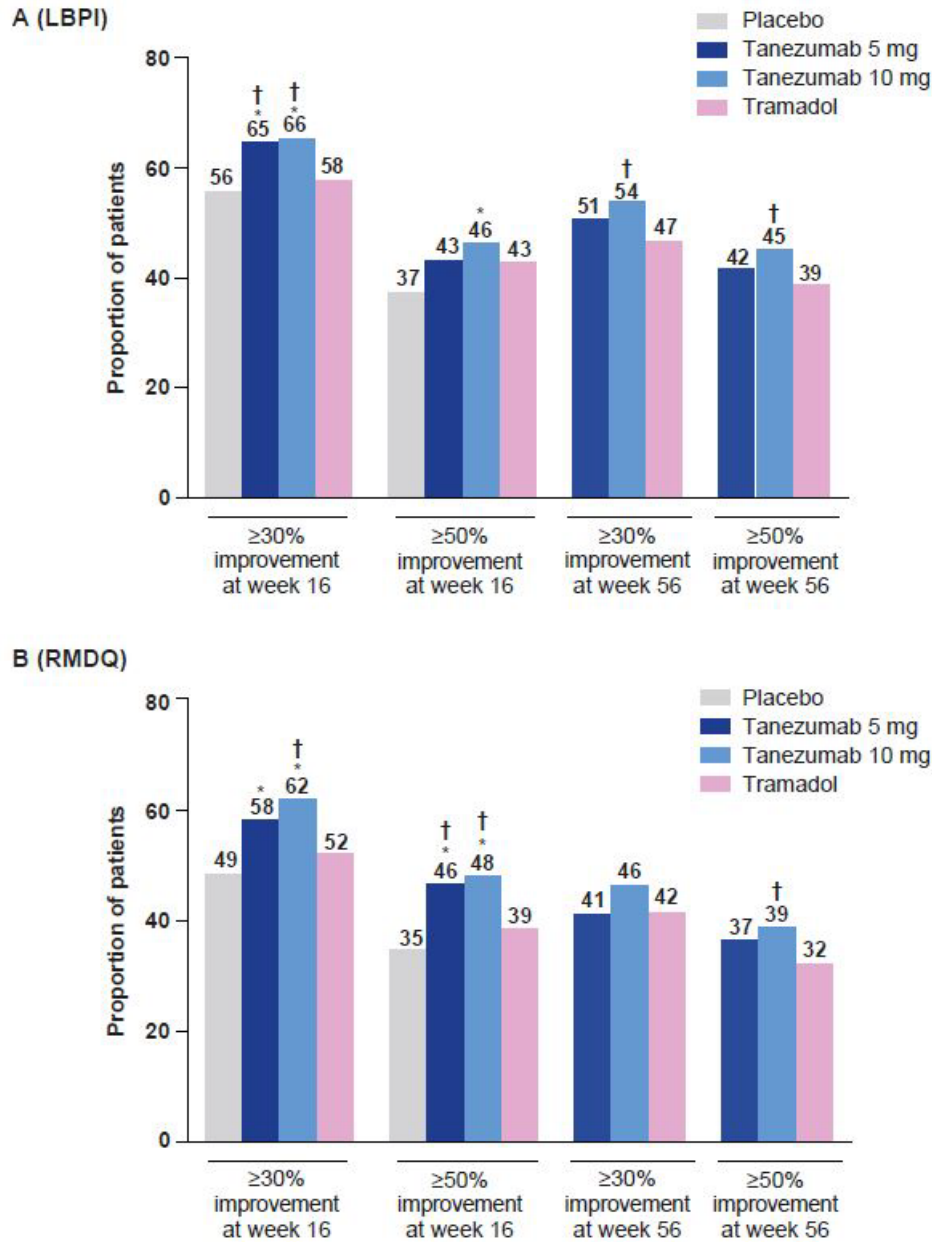

\* $p \leq 0.05$  vs placebo; <sup>†</sup> $p \leq 0.05$  vs tramadol.

<sup>a</sup> 30% and 50% improvement in LBPI at week 16 (tanezumab versus placebo; tramadol versus placebo) results have been disclosed previously in the primary publication (Markman JD, et al. Pain. 2020;161(9):2068-78).

LBPI, low back pain intensity; RMDQ, Roland Morris Disability Questionnaire.
